# Supplementary material for: Stress fibers, autophagy and necrosis by persistent exposure to PM2.5 from biomass combustion
Source: PubMed Central journal article supplement (PMC5495337; doi:10.1371/journal.pone.0180291), 2017-07-03
Supplement: pone.0180291.s002.pdf [file pone.0180291.s002.pdf]

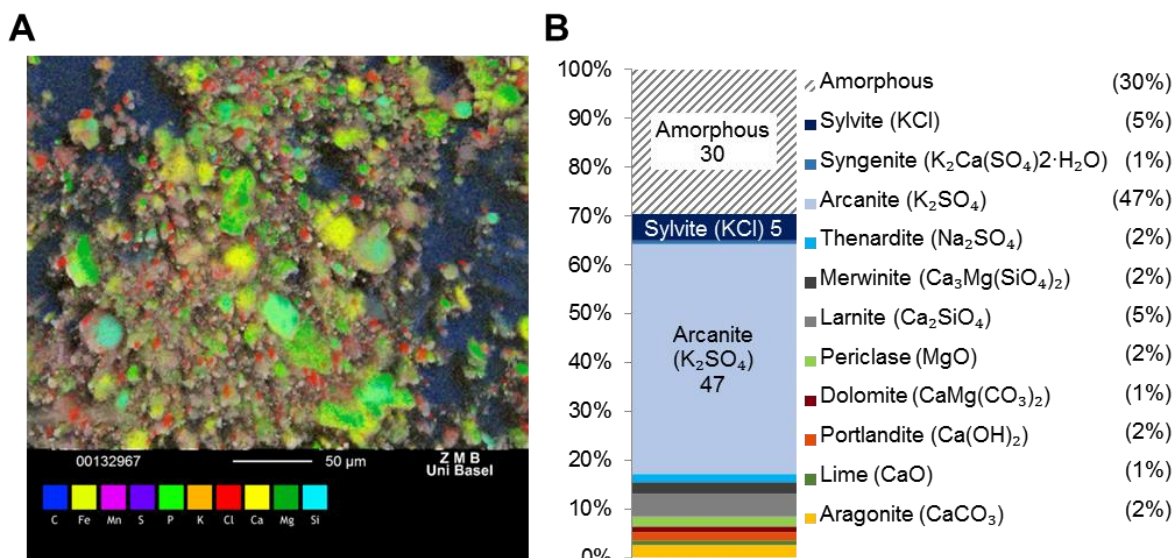

**S1 Fig.  $PM_{2.5}$  composition as determined by scanning electron microscopy, X-ray diffraction analysis and Rietveld refinement.** Color-coded SEM image of  $PM_{2.5}$  (A). Particles displayed different shapes, sizes and chemical composition. Small particles were mainly composed of potassium sulfate ( $K_2SO_4$ ) and potassium chloride (KCl), whereas larger particles mainly consisted of calcium carbonates ( $CaCO_3$ ,  $CaMg(CO_3)_2$ ) calcium hydroxide ( $Ca(OH)_2$ ), silicates and free lime (CaO). Mineralogical composition of  $PM_{2.5}$ ; values given in wt% (B)
