# Supplementary material for: Stress fibers, autophagy and necrosis by persistent exposure to PM2.5 from biomass combustion
Source: PubMed Central journal article supplement (PMC5495337; doi:10.1371/journal.pone.0180291), 2017-07-03
Supplement: pone.0180291.s003.pdf [file pone.0180291.s003.pdf]

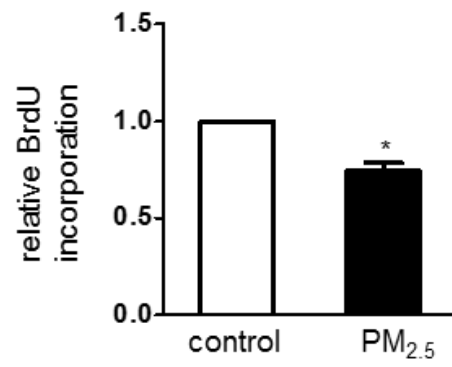

**S2 Fig. Continuous exposure to PM<sub>2.5</sub> reduces proliferation of BEAS-2B cells. Cells were left untreated or were exposed to 100 µg/ml PM<sub>2.5</sub> for 5 weeks. In the S-phase BrdU incorporation into replicating DNA was determined for 15 h during re-exposure to PM<sub>2.5</sub> for 48h**
