# Supplementary material for: Stress fibers, autophagy and necrosis by persistent exposure to PM2.5 from biomass combustion
Source: PubMed Central journal article supplement (PMC5495337; doi:10.1371/journal.pone.0180291), 2017-07-03
Supplement: pone.0180291.s004.pdf [file pone.0180291.s004.pdf]

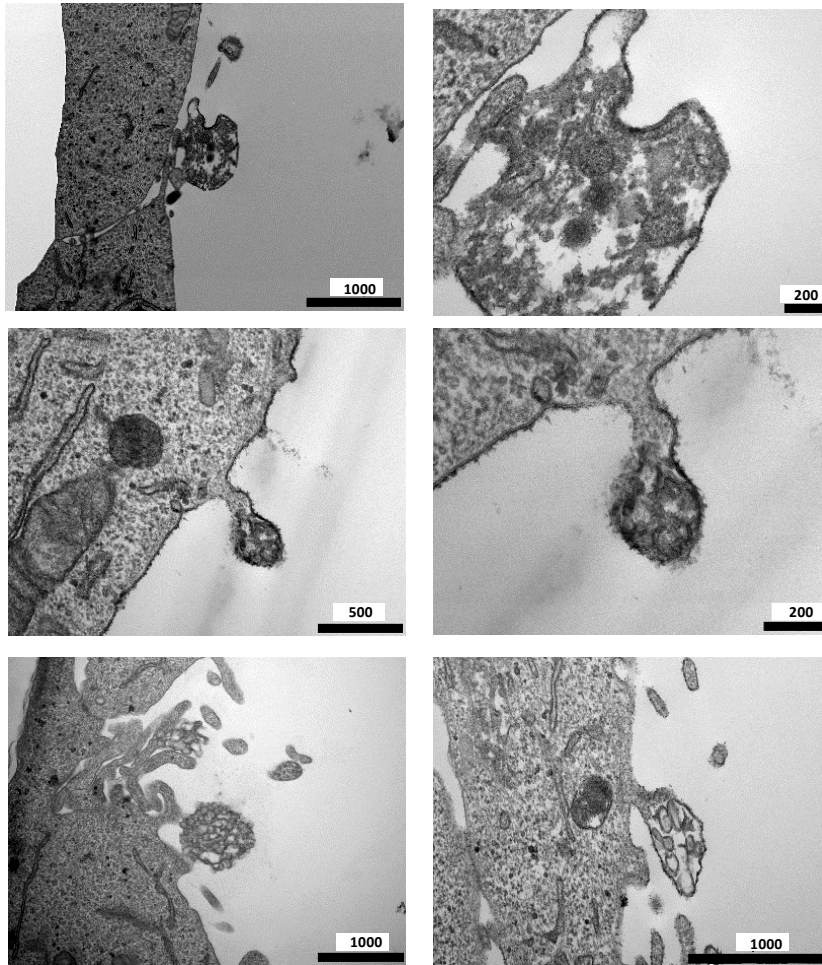

**S3 Fig. Representative TEM images of complex fusion vesicles containing PM<sub>2.5</sub> at the surface of the cell membrane of BEAS-2B cells. Scale in nm**
