# Supplementary material for: Stress fibers, autophagy and necrosis by persistent exposure to PM2.5 from biomass combustion
Source: PubMed Central journal article supplement (PMC5495337; doi:10.1371/journal.pone.0180291), 2017-07-03
Supplement: pone.0180291.s005.pdf [file pone.0180291.s005.pdf]

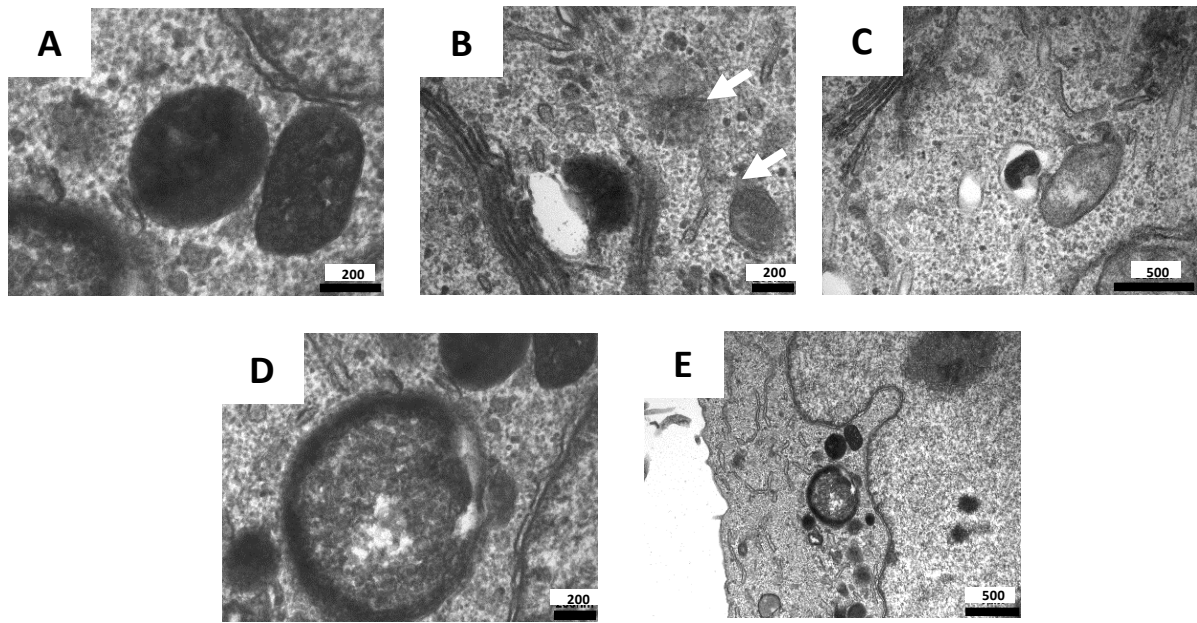

**S4 Fig. Representative TEM images of the intermediate phase of BEAS-2B cells after long-term exposure to PM<sub>2.5</sub> (100 µg/ml).** (A) Membrane bound vesicles containing PM<sub>2.5</sub>. (B, C) Vesicle (amphisome) after fusion of a membrane-bound vesicle with PM<sub>2.5</sub> and an autophagosome. White arrows indicate swollen mitochondria. (D, E) Complex fusion products with PM<sub>2.5</sub>. Scale in nm
